# Supplementary material for: An isolated bimetallic Fe–Ru single-atom catalyst for efficient electrochemical nitrogen reduction
Source: Royal Society of Chemistry journal article supplement (doi:10.1039/d3ta02408c), 2023-01-01
Supplement: d3ta02408c1.pdf [file d3ta02408c1.pdf]

# An isolated Bimetallic Fe-Ru Single-atom Catalyst for Efficient Electrochemical Nitrogen Reduction

*Mengdi Liu, Sai Zhang, Min Chen, Shuxue Zhou, Limin Wu\**

Department of Materials Science and State Key Laboratory of Molecular Engineering of Polymers, Fudan University, Shanghai, 200433, China

Corresponding E-mail: [lmw@fudan.edu.cn](mailto:lmw@fudan.edu.cn)

**Chemicals:** Zinc acetated dihydrate ( $\text{Zn}(\text{CH}_3\text{COO})_2 \cdot 2\text{H}_2\text{O}$ , 99%), iron acetylacetonate ( $\text{Fe}(\text{C}_5\text{H}_7\text{O}_2)_3$ , 99.9%), potassium hydroxide (KOH, 99%), hydrazine ( $\text{NH}_2\text{NH}_2 \cdot \text{H}_2\text{O}$ , 24–26% in  $\text{H}_2\text{O}$ ) ammonia chloride ( $\text{NH}_4\text{Cl}$ , 99.998%), Nafion perfluorinated resin solution (5 wt% in lower aliphatic alcohols and water, contains 15–20% water) and urea ( $\text{NH}(\text{CO})_2$ , 99%) were purchased from Sigma-Aldrich. 2,5-dihydroxyterephthalic acid ( $\text{C}_8\text{H}_6\text{O}_6$ , 98%), sodium sulphate ( $\text{Na}_2\text{SO}_4$ , 99%), sodium nitroferricyanide ( $\text{Na}_2[\text{Fe}(\text{CN})_5\text{NO}] \cdot 2\text{H}_2\text{O}$ , 99.98%) were purchased from Aladdin Industrial Corporation. Sodium hypochlorite ( $\text{NaClO}$ , 5% available chlorine), *p*-dimethylaminobenzaldehyde ( $\text{C}_9\text{H}_{11}\text{NO}$ , 98%), *N*-(1-naphthyl) ethylenediamine dihydrochloride ( $\text{C}_{12}\text{H}_{14}\text{N}_2$ , 98%) and *p*-aminobenzenesulfonamide ( $\text{C}_6\text{H}_8\text{N}_2\text{O}_2\text{S}$ , 99%) were purchased from J&K Scientific. Dimethyl sulfoxide-*d*6 (DMSO-*d*6) was purchased from Cambridge Isotope Laboratories, Inc. Ruthenium acetylacetonate ( $\text{Ru}(\text{C}_5\text{H}_7\text{O}_2)_3$ , 99%) was purchased from STREM chemical, Inc. Salicylic acid ( $\text{C}_7\text{H}_6\text{O}_3$ , 99.5%) was purchased from Macklin Biochemical Technology Co., Ltd.

**Computational details:** All the spin-polarized calculations are performed in the framework of the density functional theory with the projector augmented plane-wave method, as implemented in the Vienna ab initio simulation package.<sup>1</sup> The nuclei-electron and the electron exchange correlation interactions were described by the projector augmented wave (PAW) potentials and the generalized gradient approximation (GGA) with the Perdew-Burke Ernzerh of (PBE) functional, respectively.<sup>2-4</sup> The cut-off energy for plane wave is set to 400 eV. The energy criterion is set to  $10^{-5}$  eV in iterative solution of the Kohn-Sham equation. A vacuum layer of 15 Å is added perpendicular to the sheet to avoid artificial interaction between periodic images. The Brillouin zone integration is performed using a 2x2x1 k-mesh. All the structures are relaxed until the residual forces on the atoms have declined to less than 0.03 eV/Å. A semi-empirical van der Waals (vdW) correction proposed by Grimme (DFT-D3) was included to account for the dispersion interactions.<sup>5</sup>

The adsorption energies ( $\Delta G$ ) were obtained by

$$\Delta G = \Delta E_{DFT} + \Delta ZPE - T\Delta S \quad (1)$$

where  $\Delta E_{DFT}$  is the reaction energy calculated from DFT;  $\Delta ZPE$  is the zero-point energy;  $\Delta S$  is the change in entropy.

The formation energies ( $E_f$ ) of various models for systems were calculated as follows:

$$E_f = E_{embedded} - E_{pure} + n_C E_C - n_N E_N - n_{Fe} E_{Fe} - n_{Ru} E_{Ru} - n_H E_H \quad (2)$$

where  $E_{embedded}$  and  $E_{pure}$  are the total energies of nitrogen-coordinated Ru and/or Fe sites embedded carbon sheets, including the cases of pyridinic-N based, pyrrolic-N-based non-

edged and edged models. The  $n_{\text{C}}E_{\text{C}}$  is the reference energy of bulk C system. The  $n_{\text{N}}E_{\text{N}}$ ,  $n_{\text{Fe}}E_{\text{Fe}}$ ,  $n_{\text{Ru}}E_{\text{Ru}}$  and  $n_{\text{H}}E_{\text{H}}$  are the reference energies of N, Fe, Ru, and H, respectively.

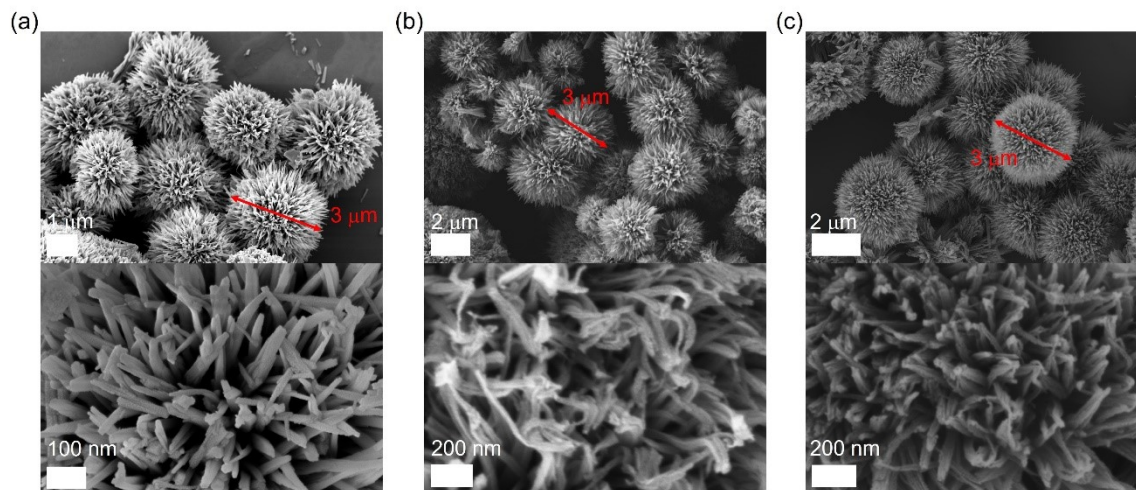

**Figure S1.** SEM images of a) MOFNR-S, b) CNS and c) FeRu-CNS.

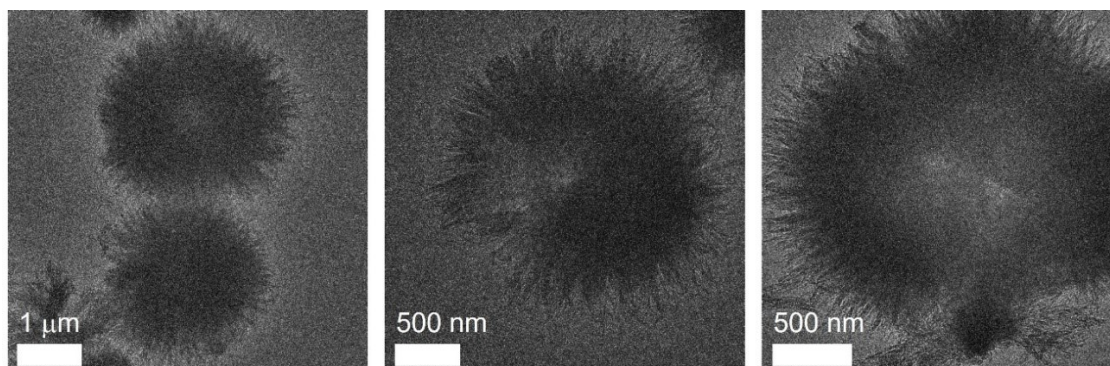

**Figure S2.** TEM images of FeRu-CNS.

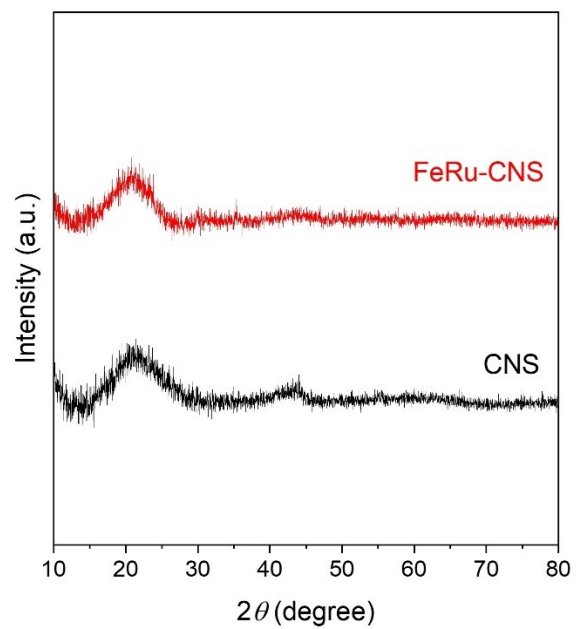

**Figure S3.** XRD patterns of CNS and FeRu-CNS.

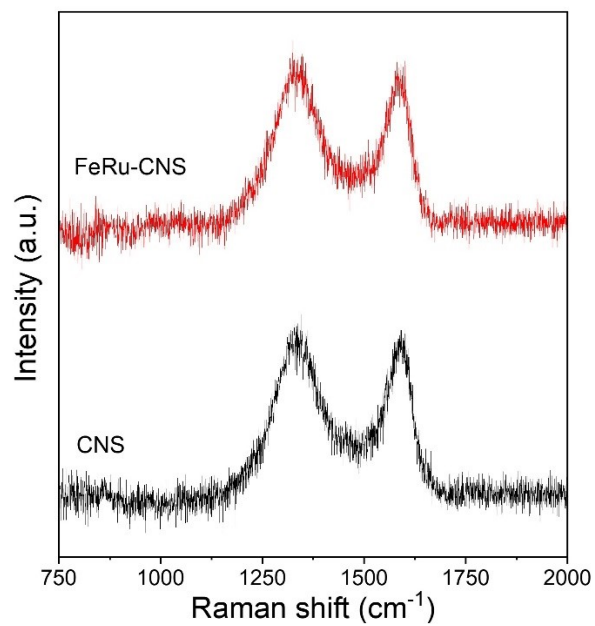

**Figure S4.** Raman spectrum of CNS and FeRu-CNS.

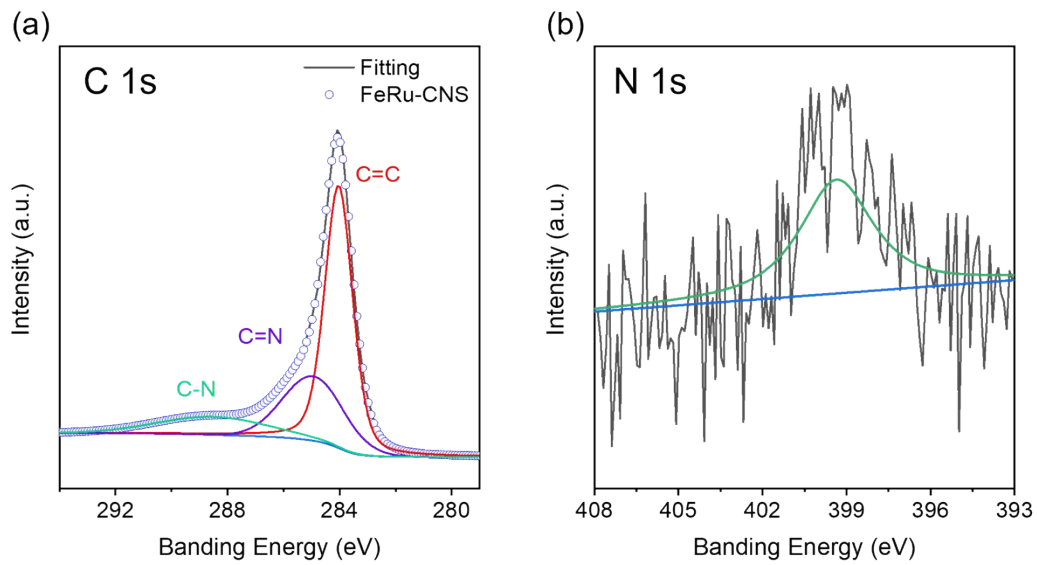

**Figure S5.** a) C 1s XPS spectra of FeRu-CNS. b) N 1s XPS spectra of FeRu-CNS.

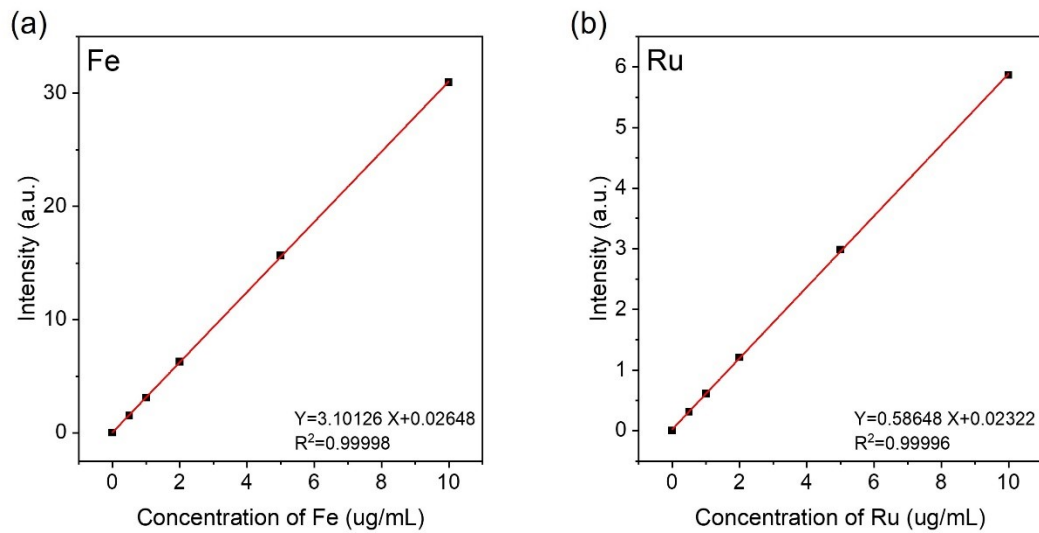

**Figure S6.** a) Calibration curve of ICP for Fe in FeRu-CNS. b) Calibration curve of ICP for Ru in FeRu-CNS.

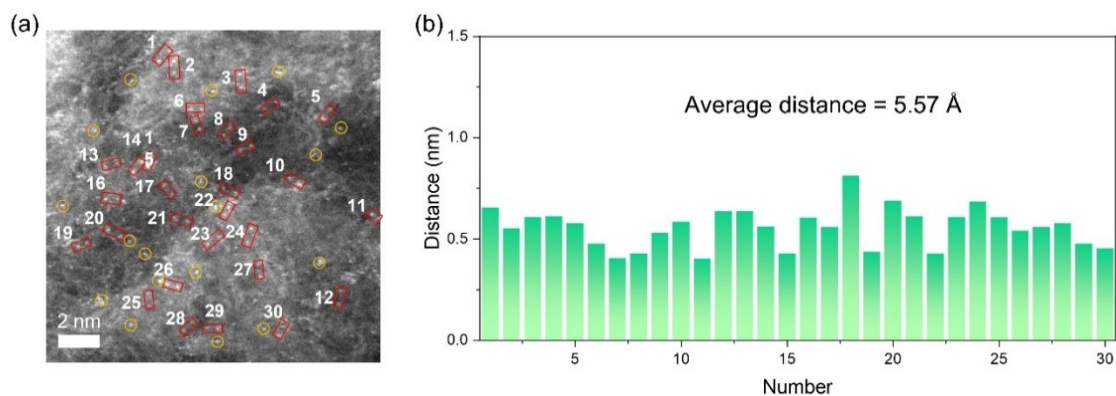

**Figure S7.** a) HAADF image of FeRu-CNS. Red squares for the isolated single atom pairs, yellow circles for the single atoms. b) Corresponding distribution of distance between isolated single atom pairs in red squares.

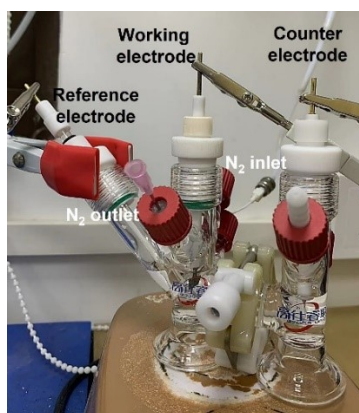

**Figure S8.** Setup for electrochemical measurement.

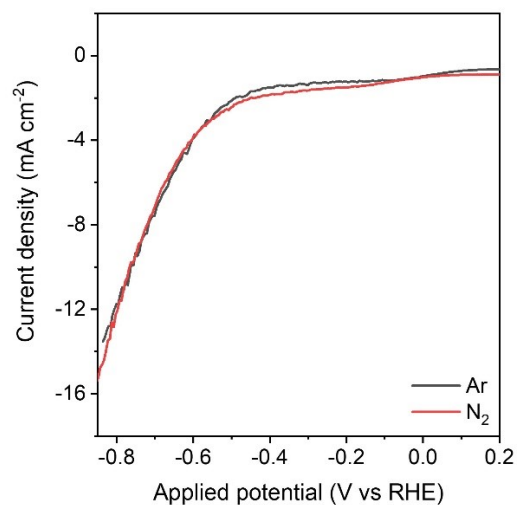

**Figure S9.** LSV curves of FeRu-CNS in 0.1 M Na<sub>2</sub>SO<sub>4</sub>.

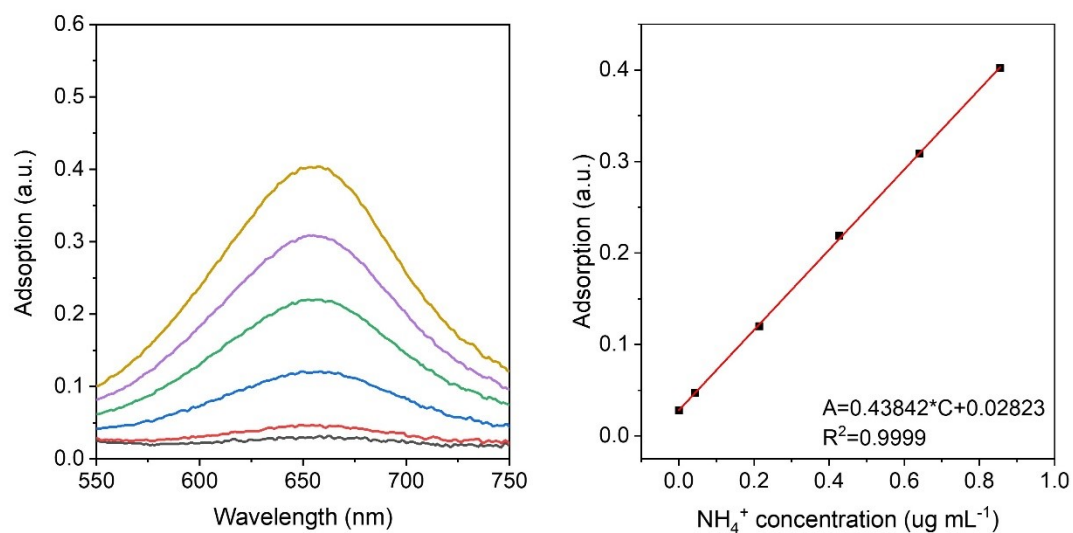

**Figure S10.** UV-Vis spectrum and Calibration curve for indophenol blue method in 0.1 M  $\text{Na}_2\text{SO}_4$ .

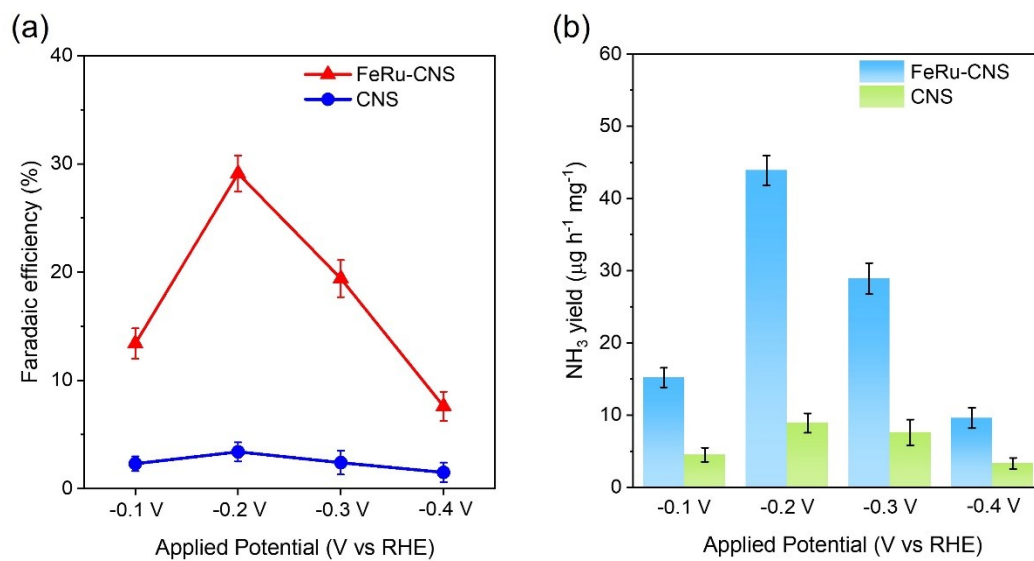

**Figure S11.** a) Faradaic efficiency of FeRu-CNS and CNS in 0.1 M  $\text{Na}_2\text{SO}_4$ . b) Corresponding  $\text{NH}_3$  yield rate of FeRu-CNS and CNS in 0.1 M  $\text{Na}_2\text{SO}_4$ .



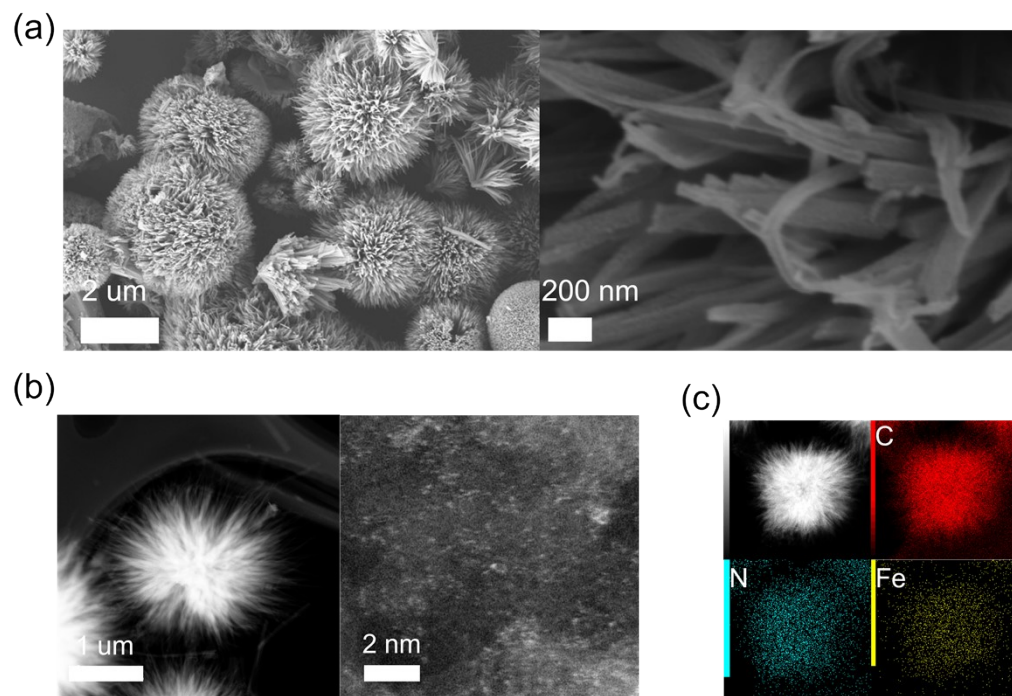

**Figure S12.** a) SEM images of Fe-CNS. b) HAADF images of Fe-CNS. c) EDS mapping of Fe-CNS.

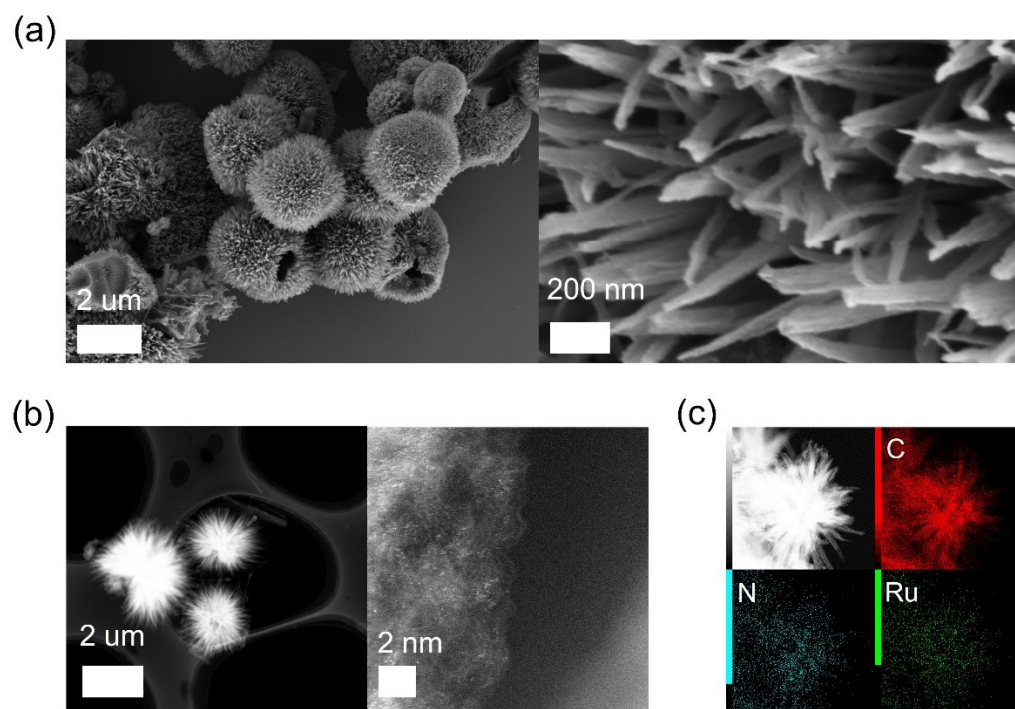

**Figure S13.** a) SEM images of Ru-CNS. b) HAADF images of Ru-CNS. c) EDS mapping of Ru-CNS.



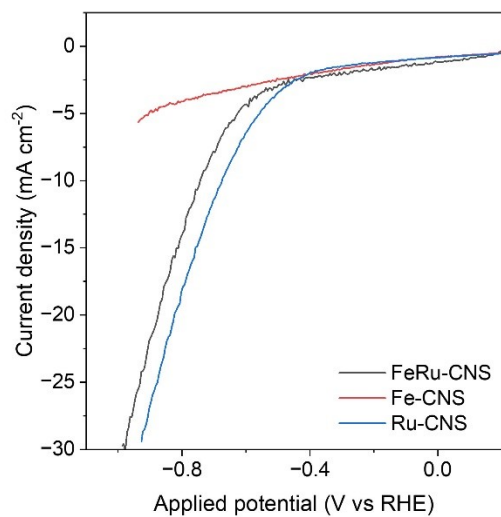

**Figure S14.** LSV curves of Fe-CNS, Ru-CNS and FeRu-CNS in N<sub>2</sub>-saturated 0.1 M Na<sub>2</sub>SO<sub>4</sub>.

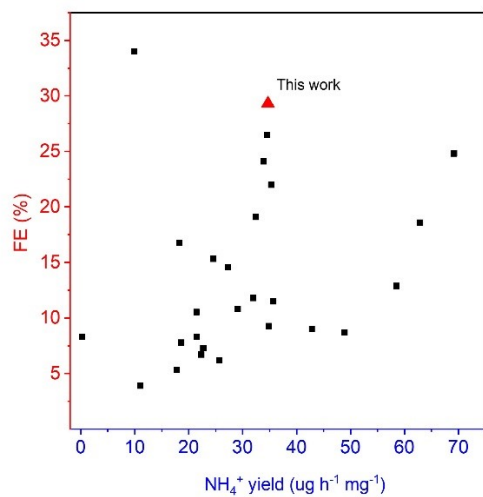

**Figure S15.** Comparison of electrochemical NRR performance of FeRu-CNS with recently reported Fe-group-based catalysts.

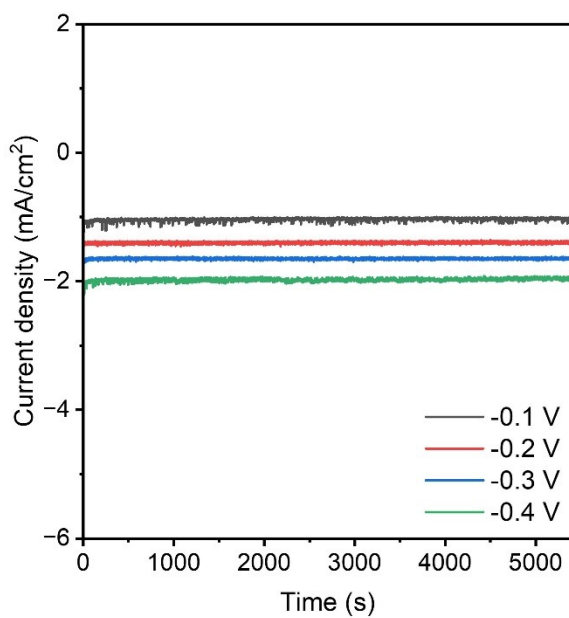

**Figure S16.** Chronoamperometry curves of FeRu-CNS in 0.1 M  $\text{Na}_2\text{SO}_4$  under different applied potentials.

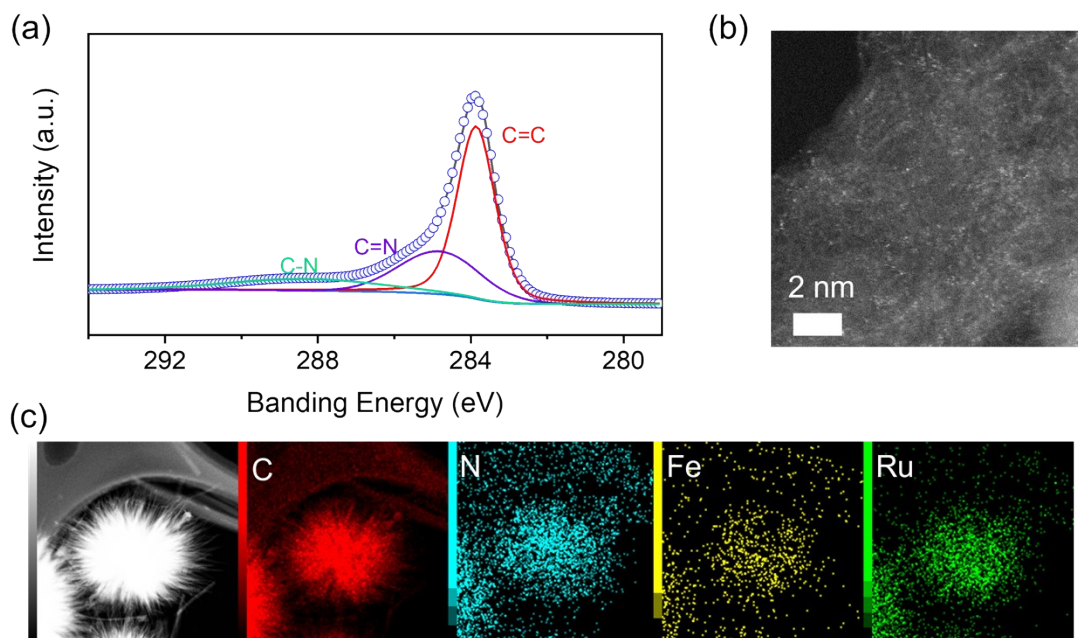

**Figure S17.** a) C 1s XPS spectra of FeRu-CNS after electrolysis. b) HAADF image of FeRu-CNS after electrolysis. c) EDS mapping of FeRu-CNS after electrolysis.

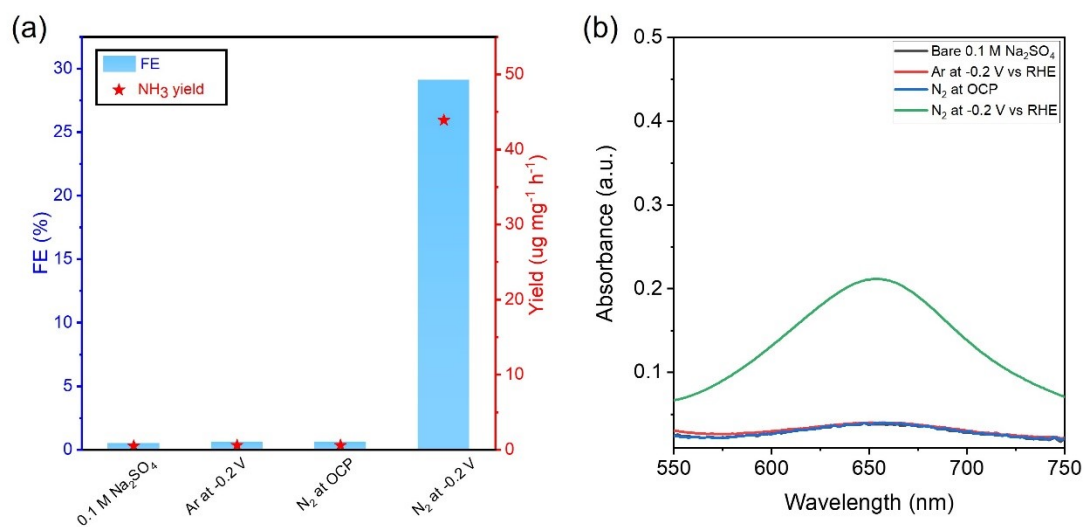

**Figure S18.** a) FE and  $\text{NH}_3$  yield rate of FeRu-CNS under different testing conditions in 0.1 M  $\text{Na}_2\text{SO}_4$ . b) Corresponding UV-Vis adsorption of electrolytes after electrolysis under different EC conditions.

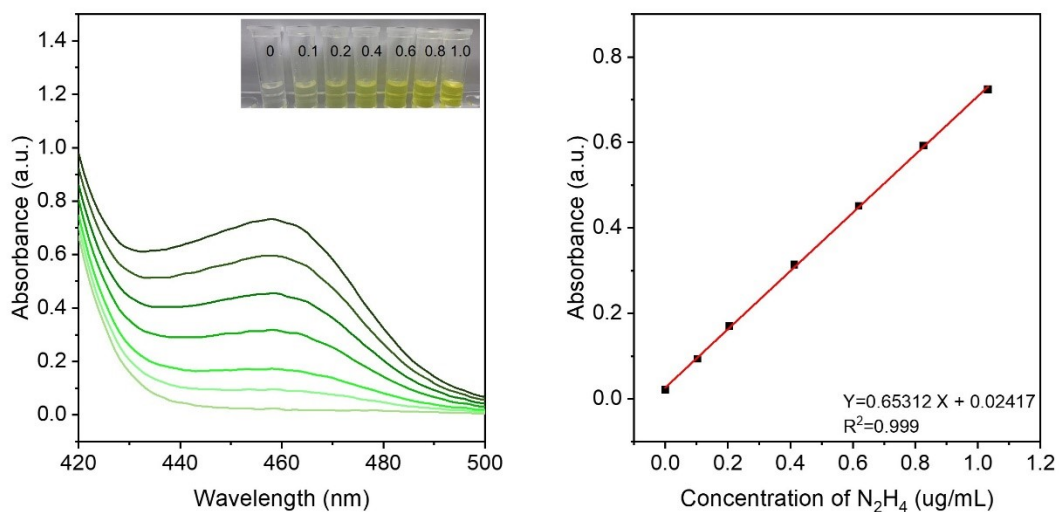

**Figure S19.** UV-Vis spectrum and Calibration curve for  $\text{N}_2\text{H}_4$  in 0.1 M  $\text{Na}_2\text{SO}_4$ .

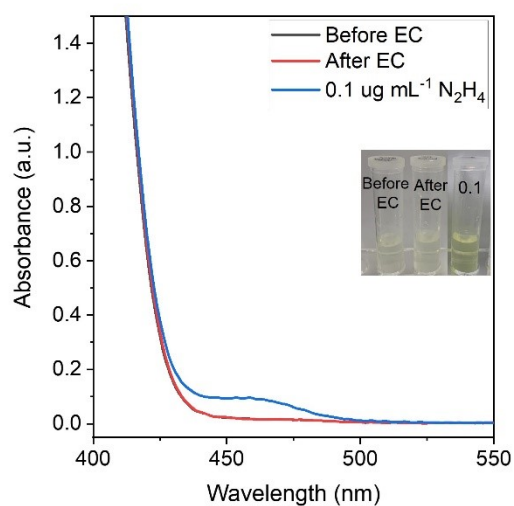

**Figure S20.** Detection of  $\text{N}_2\text{H}_4$  before and after electrochemical NRR process.

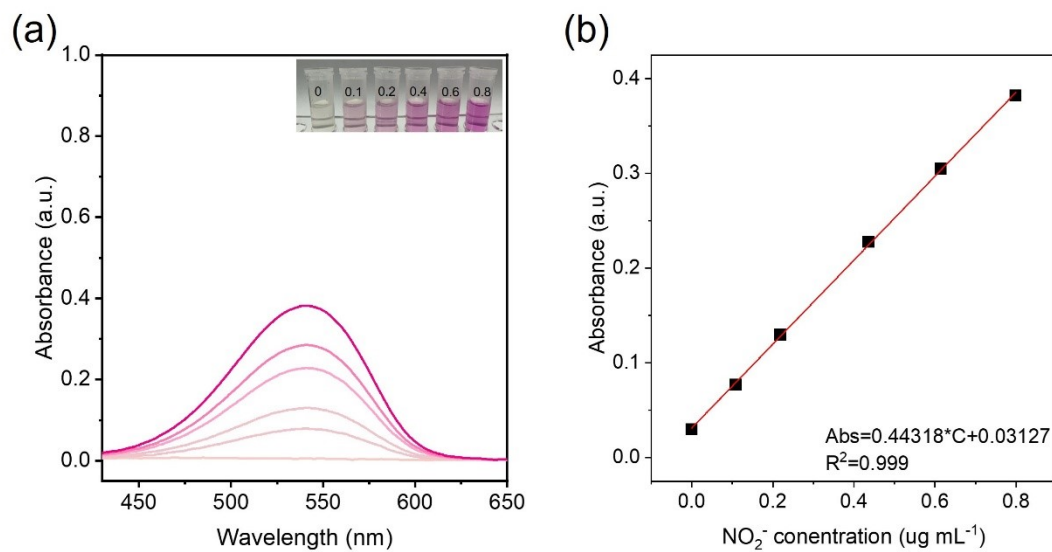

**Figure S21.** UV-Vis spectrum and Calibration curve for  $\text{NO}_2^-$  in 0.1 M  $\text{Na}_2\text{SO}_4$ .

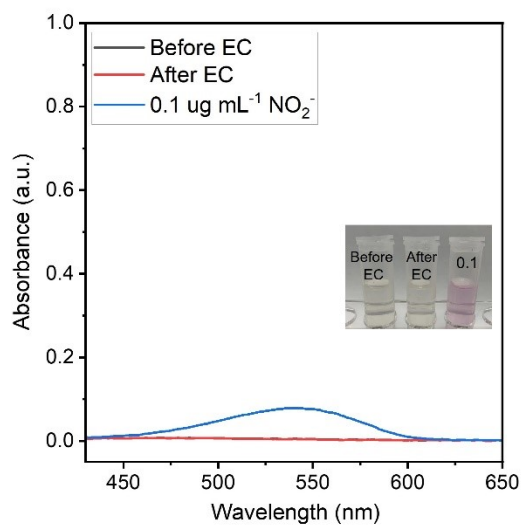

**Figure S22.** Detection of NO<sub>2</sub><sup>-</sup> before and after electrochemical NRR process.

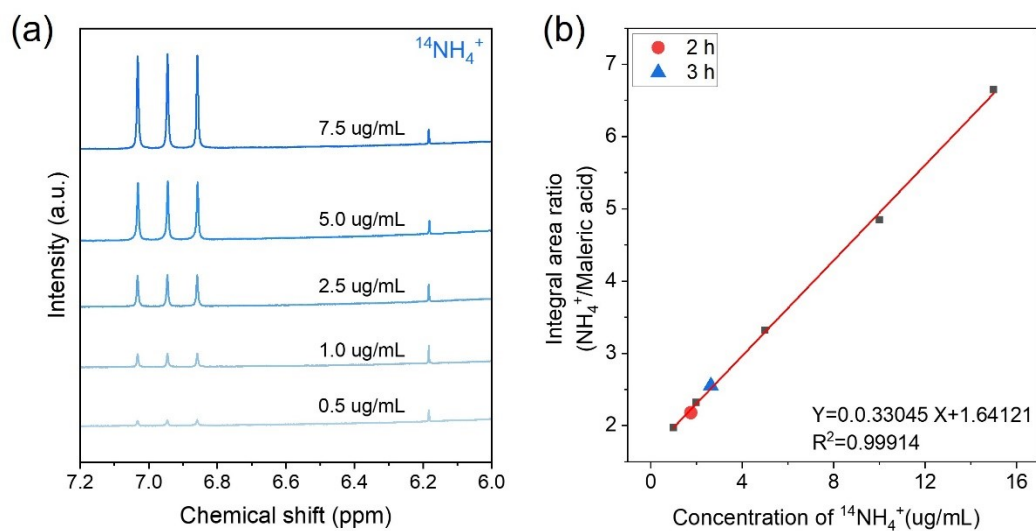

**Figure S23.** a) <sup>1</sup>H NMR spectrum of <sup>14</sup>NH<sub>4</sub><sup>+</sup> standards. b) Calibration curve of NH<sub>4</sub><sup>+</sup> concentration versus peak area ratio for <sup>14</sup>NH<sub>4</sub><sup>+</sup>.

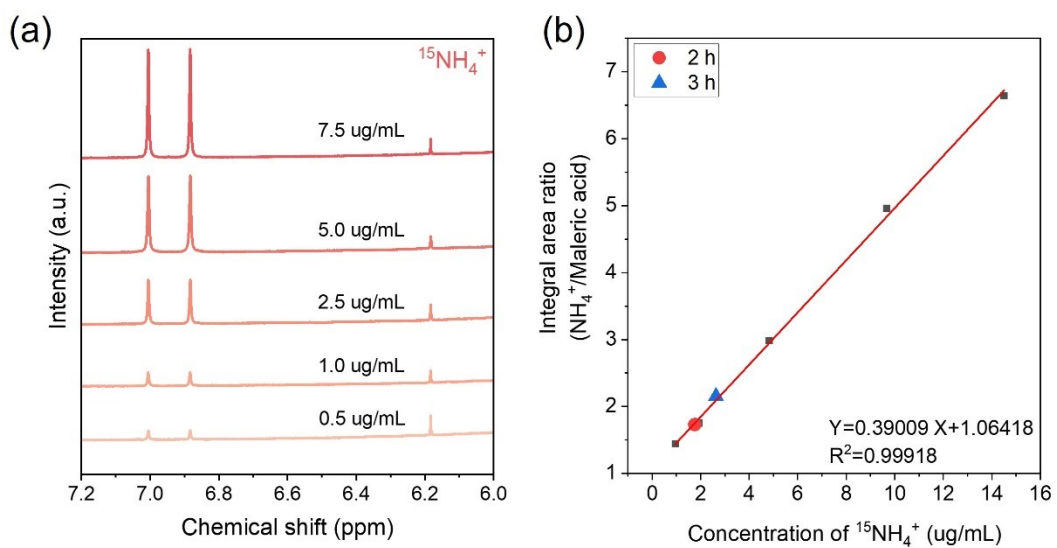

**Figure S24.** a)  $^1\text{H}$  NMR spectrum of  $^{15}\text{NH}_4^+$  standards. b) Calibration curve of  $\text{NH}_4^+$  concentration versus peak area ratio for  $^{15}\text{NH}_4^+$ .

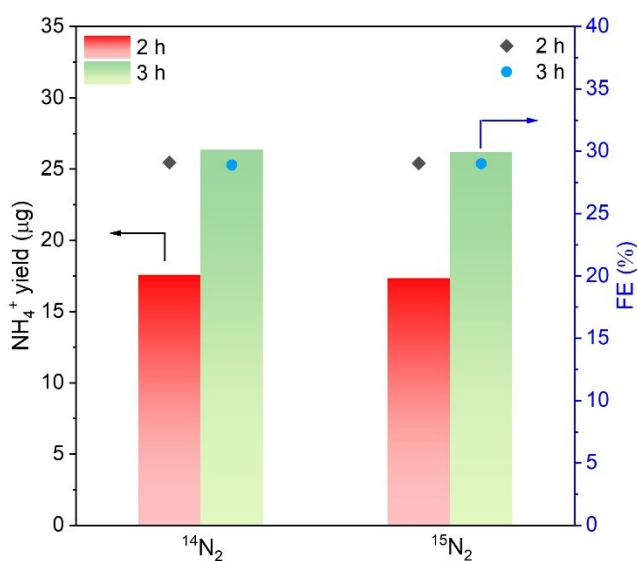

**Figure S25.** NRR ammonia yield and corresponding Faradaic efficiency measured by NMR using both  $^{14}\text{N}_2$  and  $^{15}\text{N}_2$  as feeding gas. Columns for  $\text{NH}_4^+$  yield, dots for FE.



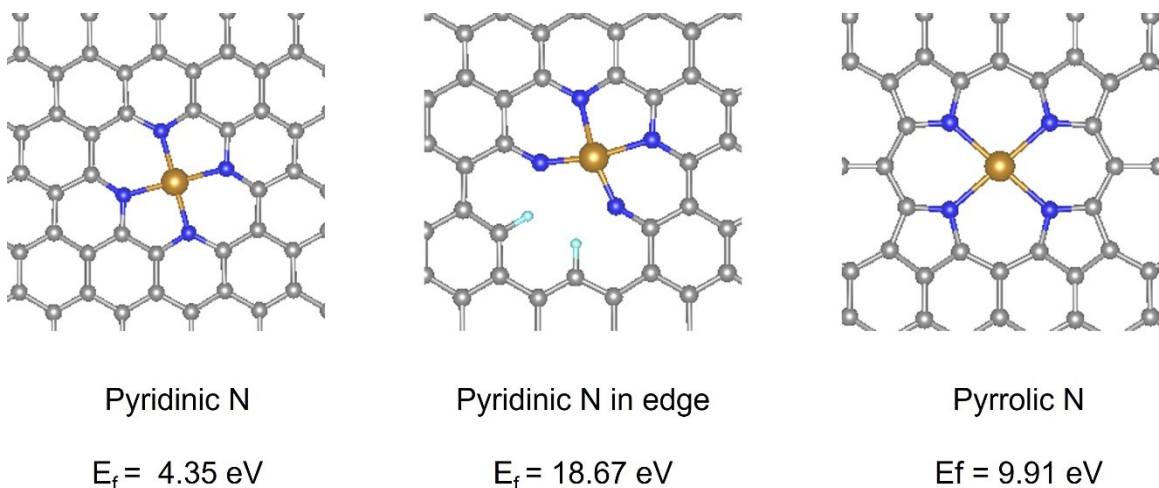

**Figure S26.** Possible configuration of  $\text{FeN}_4$  content and corresponding formation energy. Gray sphere for carbon, blue sphere for nitrogen, gold sphere for iron, light blue sphere for hydrogen.

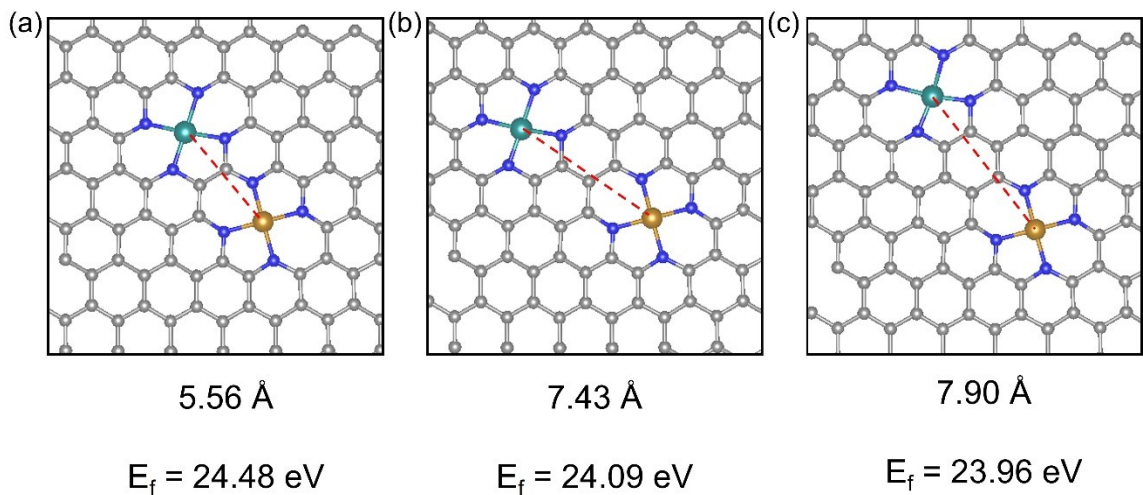

**Figure S27.** a-c) Possible configuration of  $\text{FeRu}$  and corresponding formation energy and distance between Fe and Ru atom. Gray sphere for carbon, blue sphere for nitrogen, gold sphere for iron, green sphere for ruthenium.

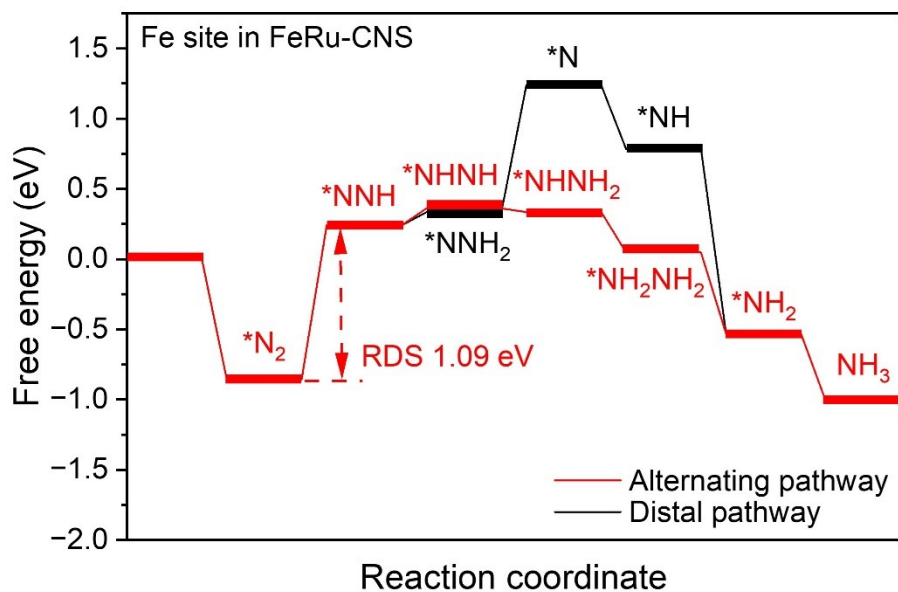

**Figure S28.** Free energy diagram of nitrogen reduction on Fe site in FeRu-CNS.

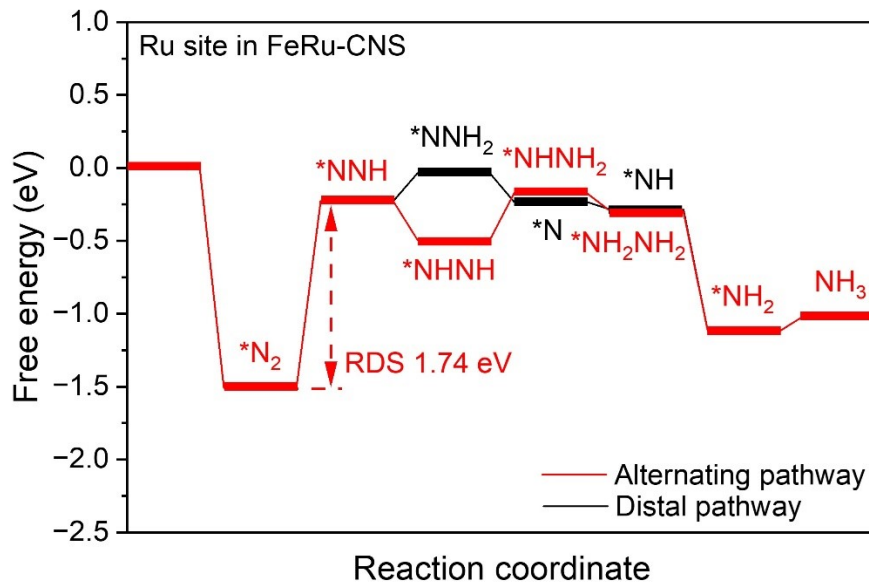

**Figure S29.** Free energy diagram of nitrogen reduction on Ru site in FeRu-CNS.

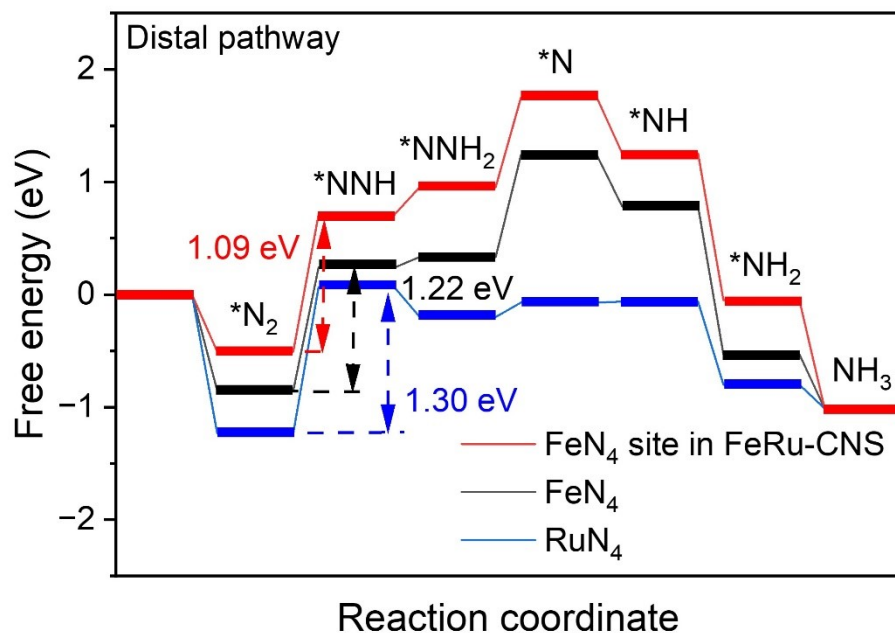

**Figure S30.** Free energy diagram of distal pathway for nitrogen reduction on FeN<sub>4</sub>, RuN<sub>4</sub> and FeN<sub>4</sub> in FeRu-CNS.

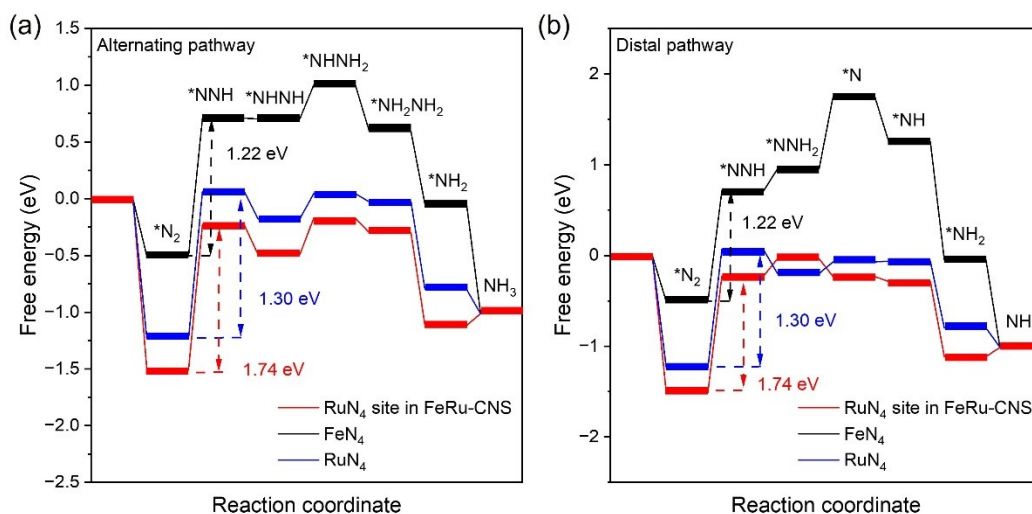

**Figure S31.** Free energy diagram of alternating pathway (a) and distal pathway (b) for nitrogen reduction on FeN<sub>4</sub>, RuN<sub>4</sub> and RuN<sub>4</sub> in FeRu-CNS.

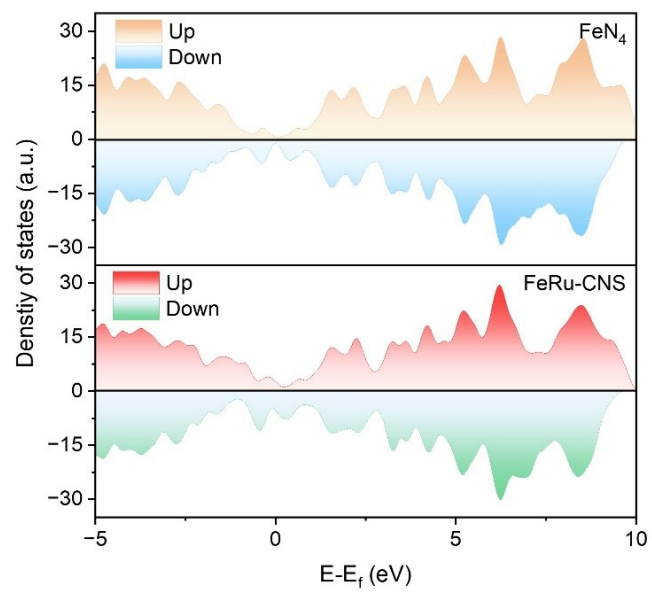

**Figure S32.** Total density of states of FeN<sub>4</sub> and FeRu-CNS.

**Table S1.** Determination of Fe and Ru content in FeRu-CNS.

| Sample | Mass $m_0$ (g) | $V_0$ (mL) | Concentration of samples $C_0$ (mg/L) | Element | Mass of element $C_x$ (mg/kg) | Wt (%) |
|--------|----------------|------------|---------------------------------------|---------|-------------------------------|--------|
| 1      | 0.0199         | 25         | 4.14                                  | Fe      | 5214.1                        | 0.52%  |
| 2      | 0.0201         | 25         | 4.05                                  | Fe      | 5422.3                        | 0.54%  |
| 3      | 0.0198         | 25         | 4.39                                  | Ru      | 5234.1                        | 0.52%  |
| 4      | 0.0199         | 25         | 4.27                                  | Ru      | 4992.4                        | 0.50%  |

**Table S2.** The Fe K-edge EXAFS curves fitting parameters of FeRu-CNS.

| Sample                         | Shell | $CN^a$   | $R(\text{\AA})^b$ | $\sigma^2(\text{\AA}^2)^c$ | $\Delta E_0(\text{eV})^d$ |
|--------------------------------|-------|----------|-------------------|----------------------------|---------------------------|
| Fe foil                        | Fe-Fe | 8*       | 2.455±0.004       | 0.0034±0.0005              | 5.2±1.0                   |
|                                | Fe-Fe | 6*       | 2.848±0.007       | 0.0044±0.0009              |                           |
| FeO                            | Fe-O  | 6.0±0.3  | 2.120±0.011       | 0.0138±0.0021              | 2.2±0.9                   |
|                                | Fe-Fe | 11.8±0.5 | 3.069±0.008       | 0.0122±0.0010              |                           |
| FePc                           | Fe-N  | 4.0±0.3  | 1.997±0.012       | 0.0109±0.0015              | 5.0±2.3                   |
|                                | Fe-C  | 6.3±0.6  | 2.937±0.023       | 0.0076±0.0014              |                           |
| Fe <sub>2</sub> O <sub>3</sub> | Fe-O  | 6.0±0.3  | 1.956±0.020       | 0.0137±0.0021              | -8.4±3.0                  |
|                                | Fe-Fe | 3.0±0.2  | 2.946±0.012       | 0.0106±0.0015              |                           |
|                                | Fe-Fe | 3.0±0.2  | 3.380±0.013       |                            |                           |
|                                | Fe-Fe | 6.0±0.5  | 3.674±0.013       |                            |                           |
| FeRu-CNS                       | Fe-N  | 3.8±0.6  | 2.013±0.013       | 0.0107±0.0020              | -0.5±2.1                  |

**Table S3.** The Ru K-edge EXAFS curves fitting parameters of FeRu-CNS.

| Sample                                  | Shell | $CN^a$  | $R(\text{\AA})^b$ | $\sigma^2(\text{\AA}^2)^c$ | $\Delta E_0(\text{eV})^d$ |
|-----------------------------------------|-------|---------|-------------------|----------------------------|---------------------------|
| Ru foil                                 | Ru-Ru | 12*     | 2.675±0.003       | 0.0042±0.0004              | -5.8±1.1                  |
| [Ru(bipy) <sub>3</sub> ]Cl <sub>2</sub> | Ru-N  | 5.7±0.4 | 2.07±0.012        | 0.0021±0.0012              | -1.1±0.9                  |
| RuO <sub>2</sub>                        | Ru-O  | 6.0±0.3 | 2.009±0.013       | 0.0039±0.0019              | -0.1±1.6                  |
|                                         | Ru-Ru | 2.3±0.2 | 3.130±0.024       | 0.0111±0.0012              |                           |
|                                         | Ru-Ru | 7.8±0.5 | 3.577±0.011       |                            |                           |
| FeRu-CNS                                | Ru-N  | 3.6±0.2 | 2.024±0.025       | 0.0066±0.0039              | 2.8±3.5                   |

**Table S4.** Comparison of electrochemical NRR performance of FeRu-CNS with recently reported Fe-group-based catalysts.

| Catalyst                               | FE (%) | Yield rate<br>( $\mu\text{g h}^{-1} \text{mg}^{-1}$ ) | Ref                                         |
|----------------------------------------|--------|-------------------------------------------------------|---------------------------------------------|
| FeRu-CNS                               | 29.3   | 43.9                                                  | This work                                   |
| NiCo <sub>2</sub> O <sub>4</sub> @HNCP | 5.3    | 17.8                                                  | J.Mater. Chem. A 2020, 8, 1652–1659         |
| CoO QD/rGO                             | 8.3    | 21.5                                                  | J. Mater. Chem. A 2019, 7, 4389–4394        |
| b-FeOOH nanorods                       | 6.7    | 22.32                                                 | Chem. Commun. 2018, 54, 11332–11335.        |
| b-FeO(OH,F) nanorods                   | 9.02   | 42.84                                                 | Chem. Commun. 2019, 55, 3987–3990.          |
| FeOOH QDs-GS                           | 14.6   | 27.3                                                  | Nano Res. 2020, 13, 209–214.                |
| Fe/Fe <sub>3</sub> O <sub>4</sub>      | 8.29   | 0.19                                                  | ACS Catal. 2018, 8, 9312–9319.              |
| FePc/C                                 | 10.5   | 137.95                                                | ACS Catal. 2019, 9, 7311–7317.              |
| ISAS-Fe/NC                             | 18.6   | 62.9                                                  | Nano Energy 2019, 61, 420–427.              |
| FeP <sub>2</sub> -rGO                  | 21.99  | 35.29                                                 | Chem. Commun. 2020, 56, 731–734.            |
| CoP/CNS                                | 8.7    | 48.9                                                  | Chem. Commun. 2019, 55, 12376–12379.        |
| NiO/G                                  | 7.8    | 18.6                                                  | ACS Appl. Energy Mater. 2019, 2, 2288–2295. |
| P-NiO/CC                               | 10.8   | 29.1                                                  | Inorg. Chem. Front. 2020, 7, 455–463.       |
| N-NiO/CC                               | 7.3    | 22.7                                                  | ChemCatChem 2019, 11, 4529–4536.            |
| Cu NPS-rGO                             | 15.32  | 24.58                                                 | J. Power Sources 2020, 448, 227417.         |
| CuO/rGO                                | 3.9    | 11.01                                                 | ChemCatChem 2019, 11, 1441–1447.            |
| Cu-doped CeO <sub>2</sub>              | 19.1   | 32.44                                                 | Chem. Commun. 2019, 55, 2952–2955.          |
| Fe-Cu clusters                         | 34     | 9.9                                                   | Adv. Mater. 2020, 32, 2004382.              |
| CoFe <sub>2</sub> O <sub>4</sub> /rGO  | 6.2    | 25.7                                                  | Chem. Commun. 2019, 55, 12184–12187.        |
| NiCoS/C                                | 12.9   | 58.5                                                  | J. Mater. Chem. A 2020, 8, 543–547.         |
| Fe <sub>SA</sub> -N/CNT                | 9.28   | 34.83                                                 | ACS Catal. 2019, 9, 336–344.                |
| Fe <sub>SA</sub> -TPPCL                | 16.76  | 18.28                                                 | Appl. Catal. B Environ. 2021, 285, 119794.  |
| Fe <sub>SA</sub> -NO-C                 | 11.8   | 31.9                                                  | Angew. Chem., Int. Ed. 2021, 60, 9078–9085. |
| PdCu/C-350                             | 11.5   | 35.7                                                  | Angew. Chem., Int. Ed. 2020, 59, 2649–2653. |
| CuAu@Cu                                | 24.1   | 33.9                                                  | Appl. Catal. B Environ. 2021, 288, 119999.  |
| Pd <sub>SA</sub> -Cu                   | 24.8   | 69.2                                                  | Angew. Chem. Int. Ed. 2020, 59, 2–8.        |
| Au-Fe <sub>3</sub> O <sub>4</sub>      | 10.54  | 21.42                                                 | Adv. Funct. Mater. 2020, 30, 1906579.       |
| Au <sub>25</sub> -Cys-Mo               | 26.5   | 34.5                                                  | Small. 2021, 17, 2100372.                   |



**Table S5.** Bader charge states of Fe and N atoms in FeN<sub>4</sub> site in FeRu-CNS after N<sub>2</sub> adsorption, and Bader charge states of Ru and N atoms in RuN<sub>4</sub> in FeRu-CNS after N<sub>2</sub> adsorption.

| Atom        | N <sub>2</sub> on Fe site in FeRu-CNS |                | N <sub>2</sub> on Ru site in FeRu-CNS |                |
|-------------|---------------------------------------|----------------|---------------------------------------|----------------|
|             | Fe                                    | N <sub>2</sub> | Ru                                    | N <sub>2</sub> |
| Lost  e     | 1.19                                  | -              | 1.31                                  | -              |
| Obtained  e | -                                     | 0.27           | -                                     | 0.32           |

**Table S6.** d-band center of Fe atoms in FeN<sub>4</sub> and FeRu-CNS.

| Atom                   | d-band center<br>(up) | d-band center<br>(down) | d-band center<br>(average) |
|------------------------|-----------------------|-------------------------|----------------------------|
| Fe in FeN <sub>4</sub> | -1.835                | -0.128                  | -0.989                     |
| Fe in FeRu-CNS         | -1.742                | -0.067                  | -0.914                     |

**Table S7.** Gibbs free energy (eV) for DFT calculations of NRR on FeN<sub>4</sub> in FeRu-CNS.

|                                      | E(DFT)    | E(cor)   | E(system) | E        |
|--------------------------------------|-----------|----------|-----------|----------|
| slab                                 | -1.01E+03 | 0        | -1006.51  | 0        |
| slab-N <sub>2</sub>                  | -1.02E+03 | 0.144981 | -1023.9   | -0.85468 |
| slab-N <sub>2</sub> H                | -1.03E+03 | 0.350259 | -1026.21  | 0.240373 |
| slab-NNH <sub>2</sub>                | -1.03E+03 | 0.732552 | -1029.52  | 0.334142 |
| slab-N                               | -1.01E+03 | 0.055844 | -1013.54  | 1.238062 |
| slab-NH                              | -1.02E+03 | 0.270773 | -1017.4   | 0.782668 |
| slab-NH <sub>2</sub>                 | -1.02E+03 | 0.604572 | -1022.11  | -0.53016 |
| slab-NH <sub>3</sub>                 | -1.01E+03 | 0        | -1006.51  | -1.01235 |
| slab                                 | -1.01E+03 | 0        | -1006.51  | 0        |
| slab-N <sub>2</sub>                  | -1.02E+03 | 0.144981 | -1023.9   | -0.85468 |
| slab-N <sub>2</sub> H                | -1.03E+03 | 0.350259 | -1026.21  | 0.240373 |
| slab-NH <sub>2</sub> NH              | -1.03E+03 | 0.731335 | -1029.49  | 0.361925 |
| slab-NH <sub>2</sub> NH <sub>2</sub> | -1.03E+03 | 1.040159 | -1032.92  | 0.335526 |
| slab-NH <sub>2</sub> NH <sub>2</sub> | -1.04E+03 | 1.41683  | -1036.61  | 0.046874 |
| slab-NH <sub>2</sub>                 | -1.02E+03 | 0.604572 | -1022.11  | -0.53016 |
| slab-NH <sub>3</sub>                 | -1.01E+03 | 0        | -1006.51  | -1.01235 |

**Table S8.** Gibbs free energy (eV) for DFT calculations of NRR on bare FeN<sub>4</sub> site.

|                                      | E(DFT)     | E(cor)   | E(system) | E        |
|--------------------------------------|------------|----------|-----------|----------|
| slab                                 | -1022.7549 | 0        | -1022.75  | 0        |
| slab-N <sub>2</sub>                  | -1039.9491 | 0.156114 | -1039.79  | -0.50725 |
| slab-N <sub>2</sub> H                | -1042.3589 | 0.379385 | -1041.98  | 0.710299 |
| slab-NNH <sub>2</sub>                | -1045.8737 | 0.734948 | -1045.14  | 0.955138 |
| slab-N                               | -1029.3266 | 0.056221 | -1029.27  | 1.749939 |
| slab-NH                              | -1033.457  | 0.285986 | -1033.17  | 1.253381 |
| slab-NH <sub>2</sub>                 | -1038.4771 | 0.599846 | -1037.88  | -0.04878 |
| slab-NH <sub>3</sub>                 | -1022.7549 | 0        | -1022.75  | -1.01235 |
| slab                                 | -1022.7549 | 0        | -1022.75  | 0        |
| slab-N <sub>2</sub>                  | -1039.9491 | 0.156114 | -1039.79  | -0.50725 |
| slab-N <sub>2</sub> H                | -1042.3589 | 0.379385 | -1041.98  | 0.710299 |
| slab-NHNH                            | -1046.1282 | 0.737198 | -1045.39  | 0.702888 |
| slab-NHNNH <sub>2</sub>              | -1049.5419 | 1.04512  | -1048.5   | 1.001187 |
| slab-NH <sub>2</sub> NH <sub>2</sub> | -1053.6905 | 1.380709 | -1052.31  | 0.592253 |
| slab-NH <sub>2</sub>                 | -1038.4771 | 0.599846 | -1037.88  | -0.04878 |
| slab-NH <sub>3</sub>                 | -1022.7549 | 0        | -1022.75  | -1.01235 |

**Table S9.** Gibbs free energy (eV) for DFT calculations of NRR on RuN<sub>4</sub> in FeRu-CNS.

|                                      | E(DFT)    | E(cor)   | E(system) | E        |
|--------------------------------------|-----------|----------|-----------|----------|
| slab                                 | -1.01E+03 | 0        | -1006.51  | 0        |
| slab-N <sub>2</sub>                  | -1.02E+03 | 0.139277 | -1024.55  | -1.50859 |
| slab-N <sub>2</sub> H                | -1.03E+03 | 0.377445 | -1026.67  | -0.22734 |
| slab-NNH <sub>2</sub>                | -1.03E+03 | 0.732113 | -1029.89  | -0.0371  |
| slab-N                               | -1.02E+03 | 0.063718 | -1015.01  | -0.23336 |
| slab-NH                              | -1.02E+03 | 0.319987 | -1018.47  | -0.28622 |
| slab-NH <sub>2</sub>                 | -1.02E+03 | 0.585042 | -1022.7   | -1.11639 |
| slab-NH <sub>3</sub>                 | -1.01E+03 | 0        | -1006.51  | -1.01235 |
| slab                                 | -1.01E+03 | 0        | -1006.51  | 0        |
| slab-N <sub>2</sub>                  | -1.02E+03 | 0.139277 | -1024.55  | -1.50859 |
| slab-N <sub>2</sub> H                | -1.03E+03 | 0.377445 | -1026.67  | -0.22734 |
| slab-NHNH                            | -1.03E+03 | 0.748262 | -1030.34  | -0.49225 |
| slab-NHNNH <sub>2</sub>              | -1.03E+03 | 1.029135 | -1033.43  | -0.1723  |
| slab-NH <sub>2</sub> NH <sub>2</sub> | -1.04E+03 | 1.378028 | -1036.96  | -0.29933 |
| slab-NH <sub>2</sub>                 | -1.02E+03 | 0.585042 | -1022.7   | -1.11639 |
| slab-NH <sub>3</sub>                 | -1.01E+03 | 0        | -1006.51  | -1.01235 |

**Table S10.** Gibbs free energy (eV) for DFT calculations of NRR on bare RuN<sub>4</sub> site.

|                                      | E(DFT)     | E(cor)   | E(system) | E        |
|--------------------------------------|------------|----------|-----------|----------|
| slab                                 | -1021.7791 | 0        | -1021.78  | 0        |
| slab-N <sub>2</sub>                  | -1039.6757 | 0.131746 | -1039.54  | -1.23402 |
| slab-N <sub>2</sub> H                | -1042.0513 | 0.402205 | -1041.65  | 0.064919 |
| slab-NNH <sub>2</sub>                | -1046.0295 | 0.713048 | -1045.32  | -0.19836 |
| slab-N                               | -1030.1817 | 0.066458 | -1030.12  | -0.07072 |
| slab-NH                              | -1.03E+03  | 0.31181  | -1033.51  | -0.06249 |
| slab-NH <sub>2</sub>                 | -1.04E+03  | 0.594889 | -1037.65  | -0.79944 |
| slab-NH <sub>3</sub>                 | -1021.7791 | 0        | -1021.78  | -1.01235 |
| slab                                 | -1021.7791 | 0        | -1021.78  | 0        |
| slab-N <sub>2</sub>                  | -1039.6757 | 0.131746 | -1039.54  | -1.23402 |
| slab-N <sub>2</sub> H                | -1042.0513 | 0.402205 | -1041.65  | 0.064919 |
| slab-NHNH                            | -1.05E+03  | 0.777568 | -1045.3   | -0.17774 |
| slab-NHNH <sub>2</sub>               | -1.05E+03  | 1.044134 | -1048.48  | 0.044301 |
| slab-NH <sub>2</sub> NH <sub>2</sub> | -1053.3243 | 1.370909 | -1051.95  | -0.02715 |
| slab-NH <sub>2</sub>                 | -1.04E+03  | 0.594889 | -1037.65  | -0.79944 |
| slab-NH <sub>3</sub>                 | -1021.7791 | 0        | -1021.78  | -1.01235 |

## Reference

1. G. Kresse, D. Joubert, *Phys. Rev. B*, 1999, **59**, 1758-177.
2. P.E. Blöchl, *Phys. Rev. B*, 1994, **50**, 17953–17979.
3. J.P. Perdew, K. Burke, M. *Phys. Rev. Lett.*, 1996, **77**, 3865-3868.
4. J.P. Perdew, M. Ernzerhof, *J. Chem. Phys.*, 1996, **105**, 9982–9985.
5. S. Grimme, J. Antony, S. Ehrlich and H. Krieg, *J. Chem. Phys.*, 2010, **132**, 154104.
